# Supplementary material
Source: PubMed Central journal article supplement (PMC6124423)

## Supplemental Data

### Supplemental Figure Legends

**Supplemental Figure 1. Hematologic profile of *Kras*<sup>ex3op/ex3op</sup> mice.** (A) Scatter plots show PB hemoglobin concentration (Hgb) and platelet counts (Plt) in *Kras*<sup>ex3op/ex3op</sup> mice (*ex3op*) and *Kras*<sup>nat/nat</sup> mice (*nat*). *n*=20/group. (B) Percentages of double negative (DN) and double positive (DP) thymocytes, (C) single positive CD4<sup>+</sup> (SP4) and single positive CD8<sup>+</sup> (SP8) thymocytes, and (D) early thymic progenitor cells (ETPs) in *ex3op* mice and *nat* mice. (E) At left, representative microscopic images of femurs from *ex3op* mice and *nat* mice stained with hematoxylin and eosin; 10x magnification. At right, mean numbers of BM cells/femur are shown. *n*=9/group, \*\*\**P*<0.001. (F) Scatter plots show spleen masses in *ex3op* mice and *nat* mice at 8 weeks. (G) Scatter plots show percentages of BM CLPs, CMPs, MEPs and GMPs in *ex3op/ex3op* mice and *nat/nat* mice at 8 weeks of age. *n*=6-11/group, \**P*<0.05.

**Supplemental Figure 2. Analysis of donor myeloid cells, B cells and T cells as a percentage of total donor CD45.2<sup>+</sup> cells in mice transplanted with *ex3op* BM cells or *nat* BM cells.** (A) Mean ( $\pm$  SD) percentage donor CD45.2<sup>+</sup>CD11b<sup>+</sup> myeloid cells, CD45.2<sup>+</sup>B220<sup>+</sup> B cells and CD45.2<sup>+</sup>CD3<sup>+</sup> T cells over time as a percentage of total donor CD45.2<sup>+</sup> cells in the PB of recipient CD45.1<sup>+</sup> mice transplanted with BM cells from *ex3op* mice or *nat* mice. *n*=12/group, \**P*<0.05, \*\**P*<0.01. (B) Scatter plots show percentages and numbers of BM ckit<sup>+</sup>sca-1<sup>+</sup>lin<sup>-</sup> progenitor cells at day +14 following 750 cGy TBI in *ex3op* mice and *nat* mice. *n*=8/group. Student's *t* test for all comparisons, means  $\pm$  SEM.

**Supplemental Figure 3. Twelve month old *Kras<sup>ex3op/ex3op</sup>* mice show no signs of myeloproliferative disease or leukemia.** (A) Mean PB WBCs, neutrophils, lymphocytes, hemoglobin and platelet counts in *ex3op* mice and *nat* mice at 12 months of age.  $n=5/\text{group}$ . (B) Scatter plots show PB myeloid cells (CD11b/Gr1), B cells (B220) and T cells (CD3) in *ex3op* mice and *nat* mice at 12 months of age.  $n=5/\text{group}$ . (C) Mean spleen mass in *ex3op* mice and *nat* mice at 12 months.  $n=6/\text{group}$ . (D) Mean percentages of myeloid cells, B cells and T cells in the spleen in 12 month old mice.  $n=5/\text{group}$ . Two-tailed Student's t-test was performed for all analyses. Error bars represent means  $\pm$  SEM.

**Supplemental Figure 4. Wild-type *Kras* increases proliferation of HSCs and myeloid progenitor cells.** Mean BrdU positive ckit<sup>+</sup>sca1<sup>-</sup>lin<sup>-</sup> myeloid progenitor cells (A) and CLPs (B) at 24 hours following BrdU administration (intraperitoneal) in *ex3op* mice and *nat* mice.  $n=8/\text{group}$ , \*\*\* $P < 0.001$ . (C) Representative flow cytometric analysis of CD150<sup>+</sup>CD48<sup>-</sup> HSC gating utilized for analysis of BrdU labeling shown in Figure 5B and Supplemental Figure 4D. (D) At left, representative BrdU incorporation at day +5 in BM HSCs from *nat* mice and *ex3op* mice following continuous BrdU administration in drinking water. Mean percentages of BrdU positive HSCs are shown at right.  $n=6/\text{group}$ . \* $P < 0.05$ . (E) Mean BrdU positive ckit<sup>+</sup>sca1<sup>-</sup>lin<sup>-</sup> myeloid progenitor cells and KSL cells in *ex3op* mice and *nat* mice at day +14 following 750 cGy TBI.  $n=8/\text{group}$ . \*\* $P < 0.01$ , \*\*\* $P < 0.001$ . (F) Mean percentages of Annexin<sup>+</sup>7AAD<sup>-</sup> and Annexin<sup>+</sup>7AAD<sup>+</sup> BM KSL cells and HSCs at baseline in 8-12 week old *ex3op* mice and *nat* mice.  $n=6/\text{group}$ . (G) Mean percentages of Annexin<sup>+</sup>7AAD<sup>-</sup> and Annexin<sup>+</sup>7AAD<sup>+</sup> PB B220<sup>+</sup> B cells at baseline in 8-12 week old *ex3op* mice and *nat* mice.  $n=6/\text{group}$ . (H) Mean percentages of Ds-Red<sup>+</sup>

hematopoietic cells in *DsRed* – *negative* recipient mice at 18 hours following intravenous injection of  $4 \times 10^4$  BM KSL cells from *Kras*<sup>*ex3op/ex3op*</sup>;*DsRed* mice or *Kras*<sup>*nat/nat*</sup>;*DsRed* mice into lethally irradiated *Kras*<sup>*nat/nat*</sup> mice (DsRed-negative). *n*=5/group. Two-tailed Student's t-tests for all comparisons; Error bars represent means  $\pm$  SEM.

**Supplemental Figure 5. BM KSL cells from *Kras*<sup>*ex3op/ex3op*</sup> mice demonstrate increased phosphorylation of Erk1/2.** (A) BM KSL cells from *ex3op* mice or *nat* mice were treated with 20 ng/ml TPO, 125 ng/ml Stem Cell Factor (SCF), 50 ng/ml Flt-3 lig (TSF media) or TPO, SCF or Flt-3 lig alone and p-Erk1/2 levels were measured at 5 minutes. Mean p-Erk1/2 positive KSL cells are shown for each group. *n*=5/group, \**P*<0.05. (B) Mean fluorescence intensity of p-S6, p-Akt and p-STAT5 in BM KSL cells from the mice shown in response to 20 ng/ml TPO treatment (5 minutes). *n*=5/group. (C) Relative expression of cell cycle regulatory genes in BM KSL cells from *ex3op* mice and *nat* mice at baseline. *n*=8/group. Two-tailed Student's t-test was performed for all comparisons. Error bars represent means  $\pm$  SEM.

Supplemental Figure 1

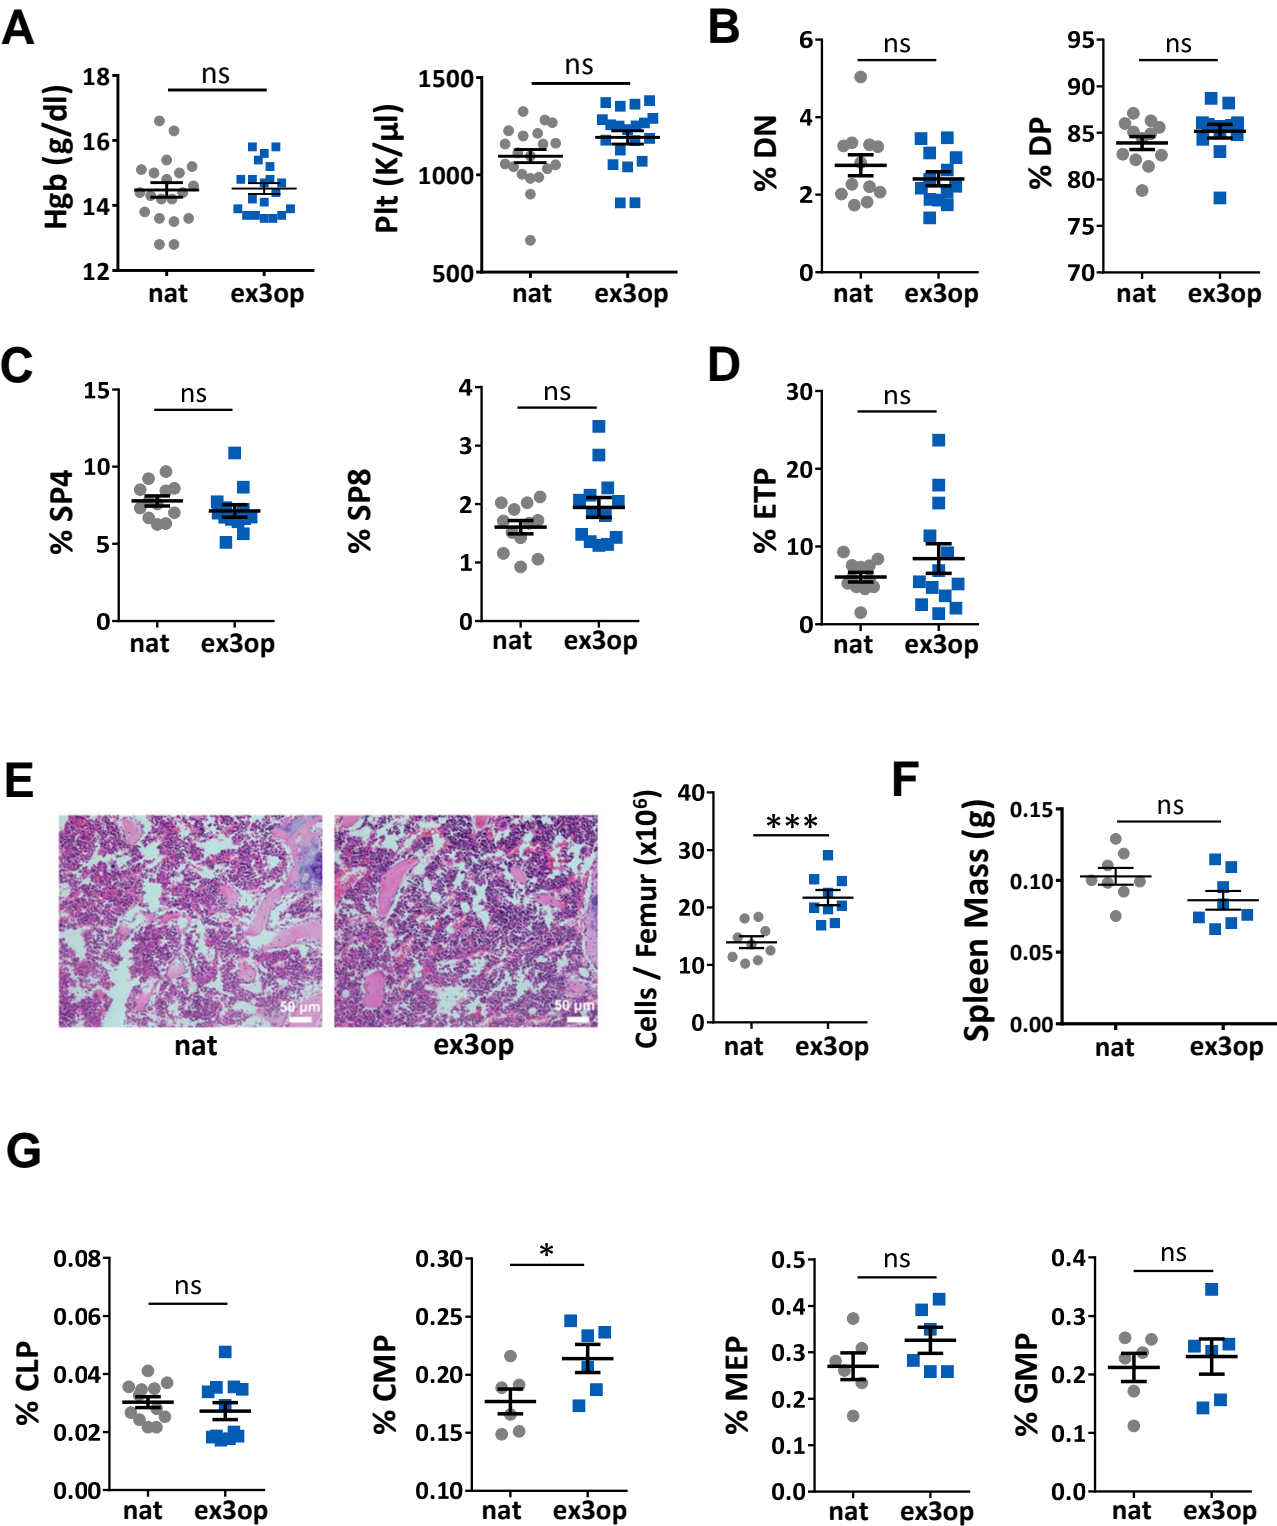

Supplemental Figure 2

**A**

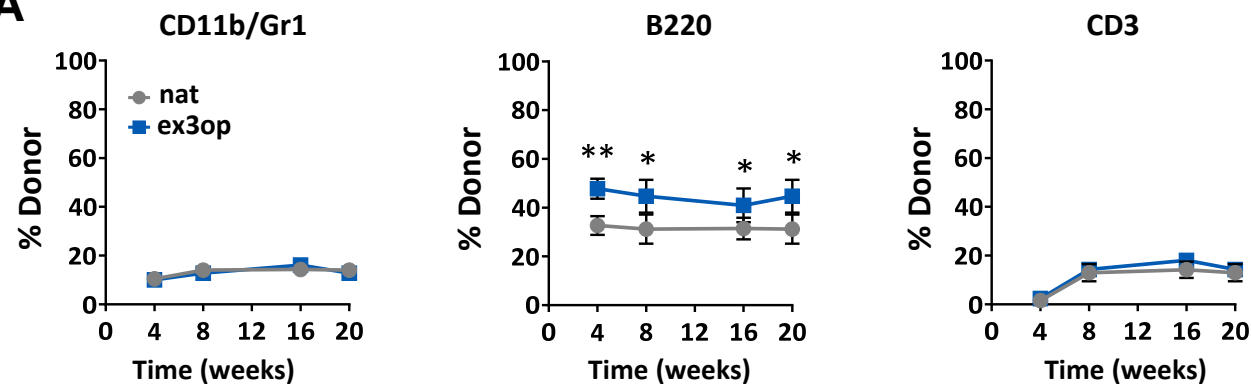

**B**

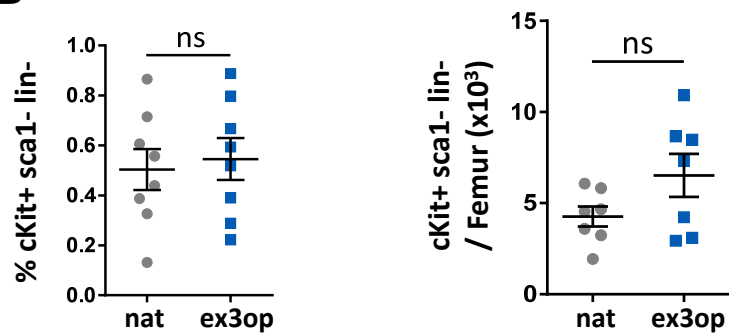

Supplemental Figure 3

**A**

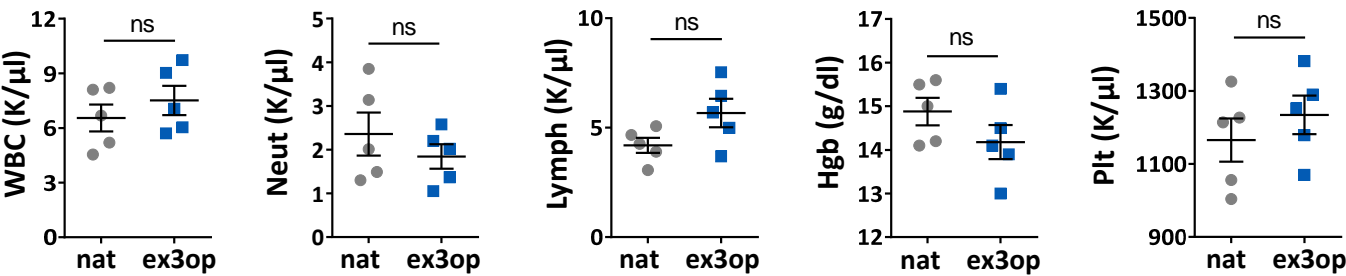

**B**

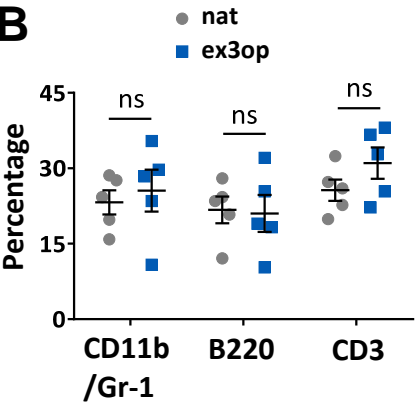

**C**

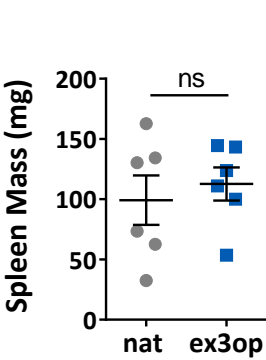

**D**

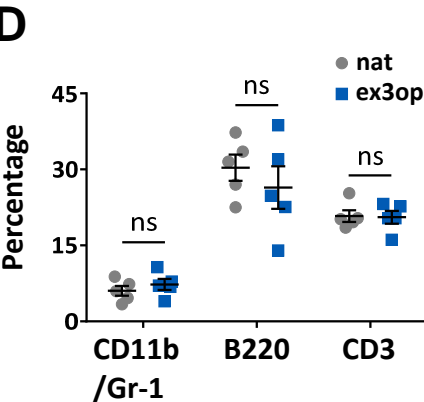

Supplemental Figure 4

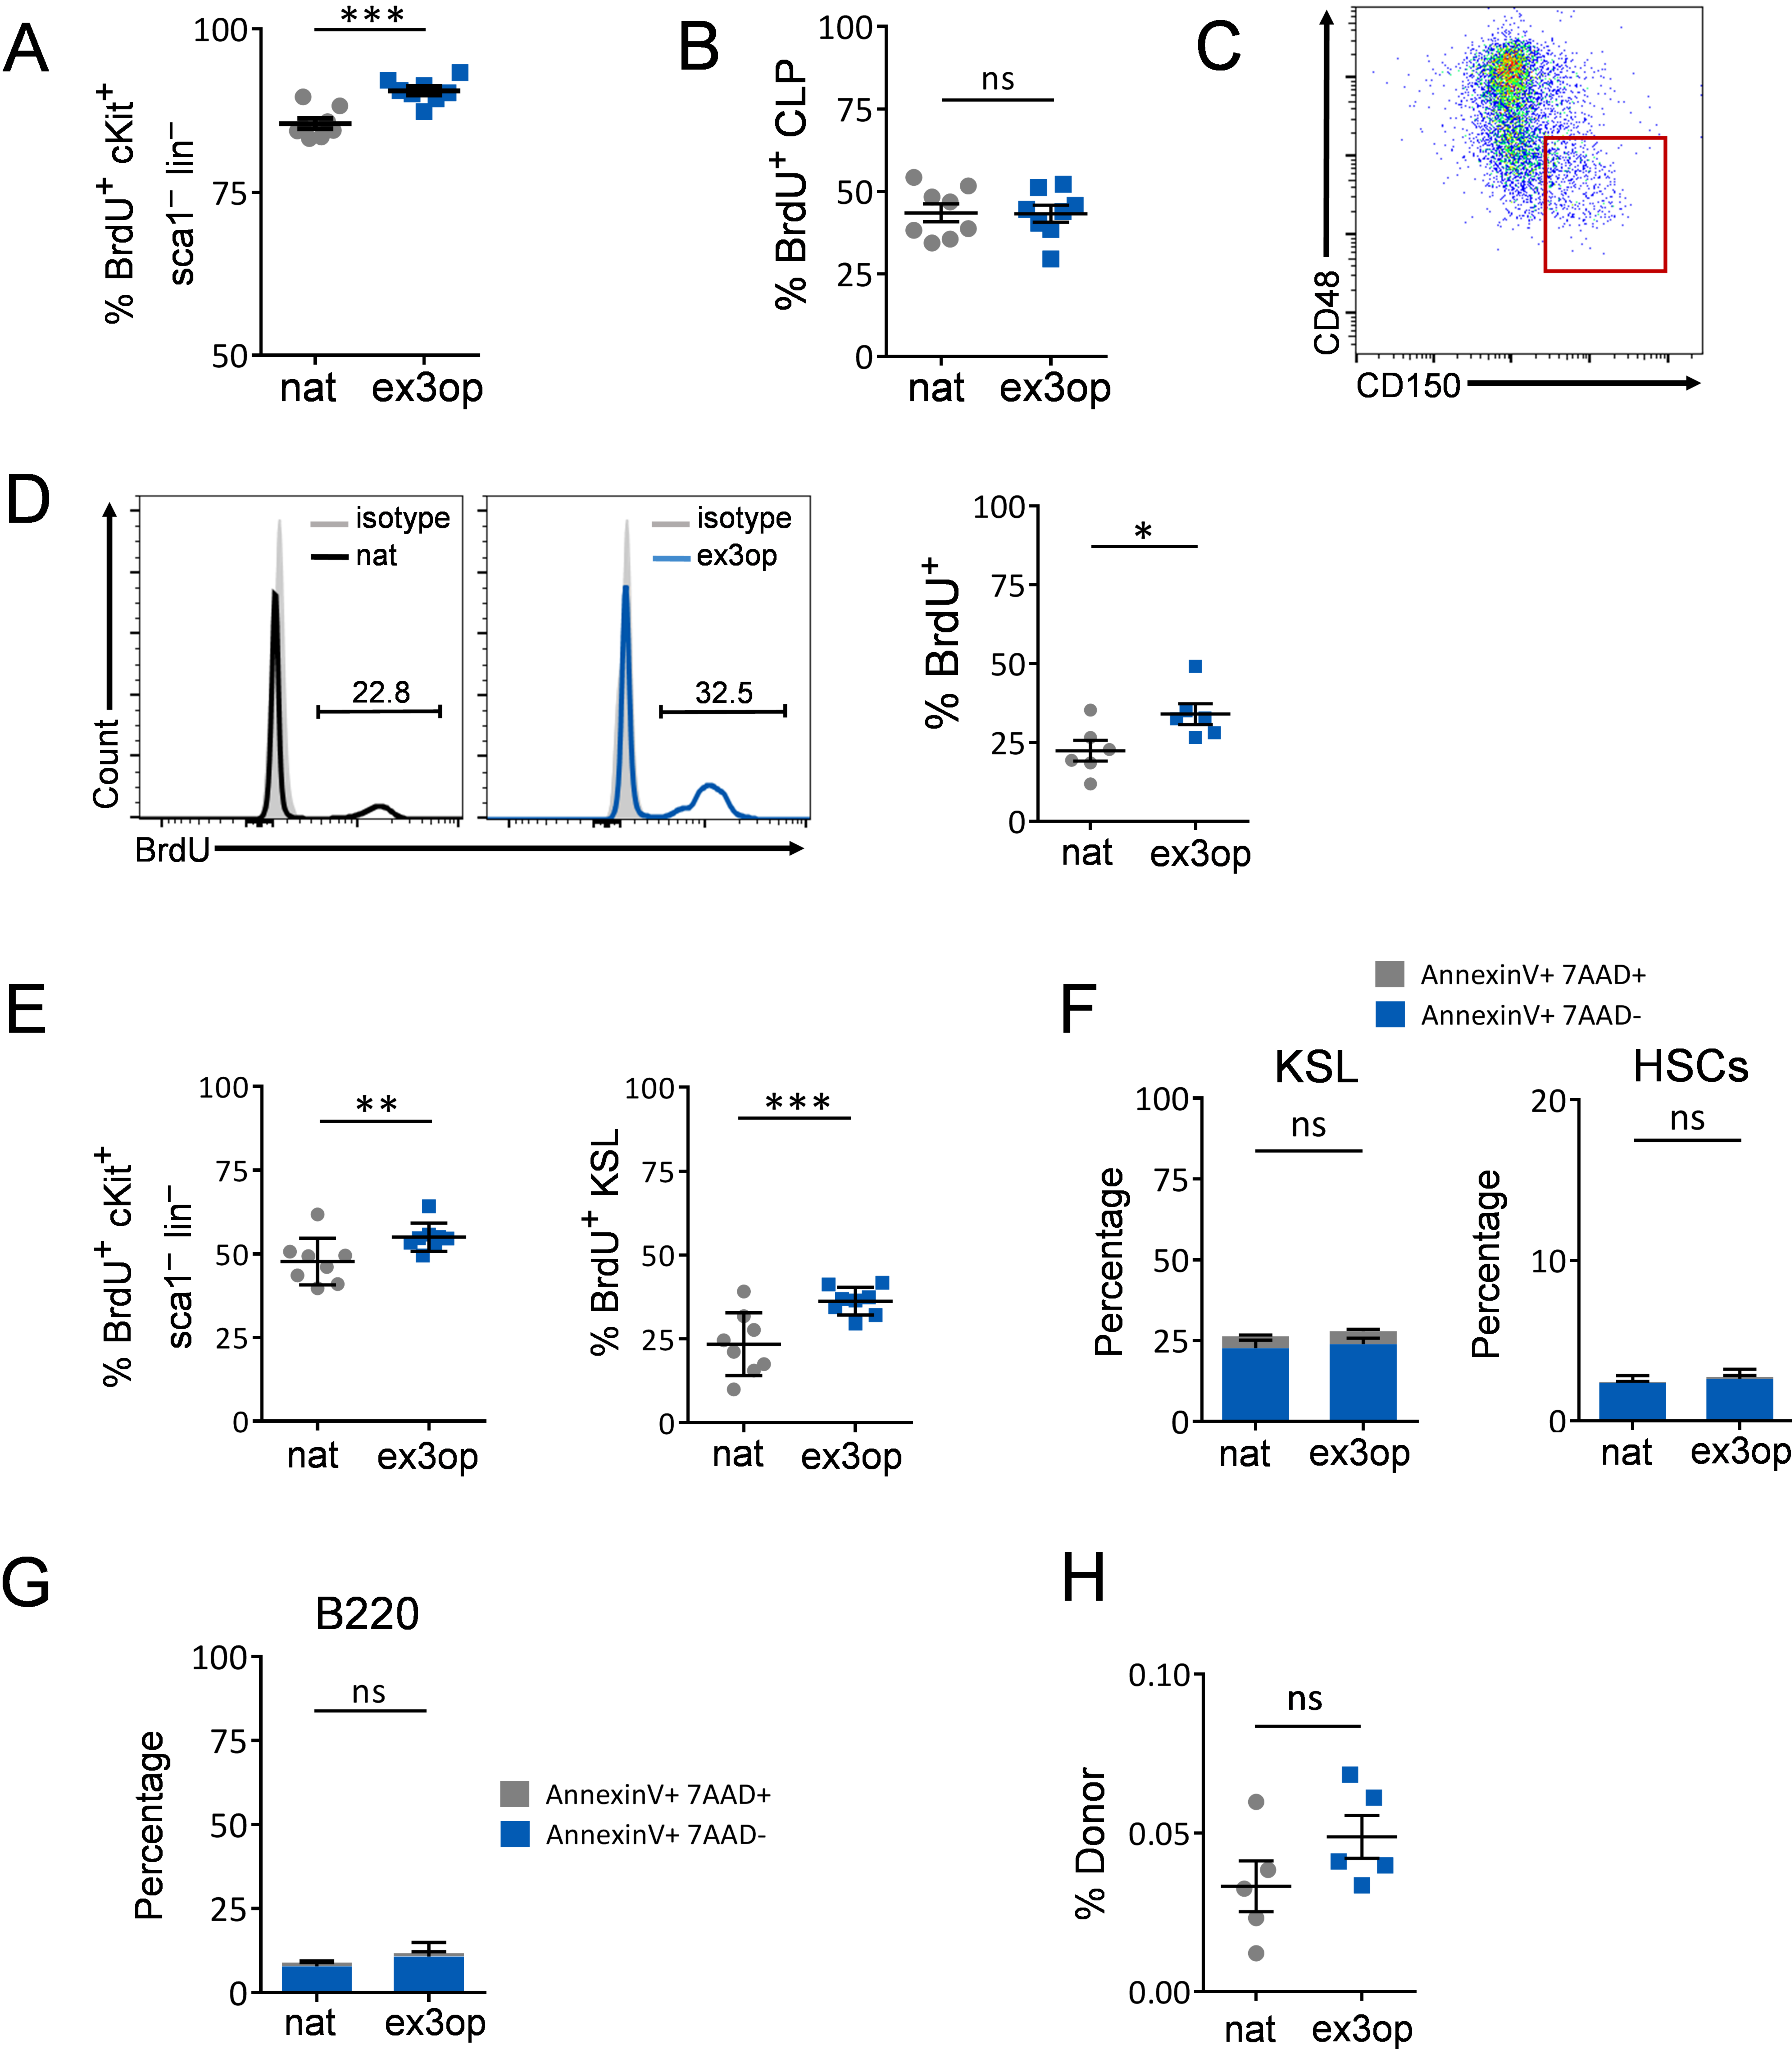

Supplemental Figure 5

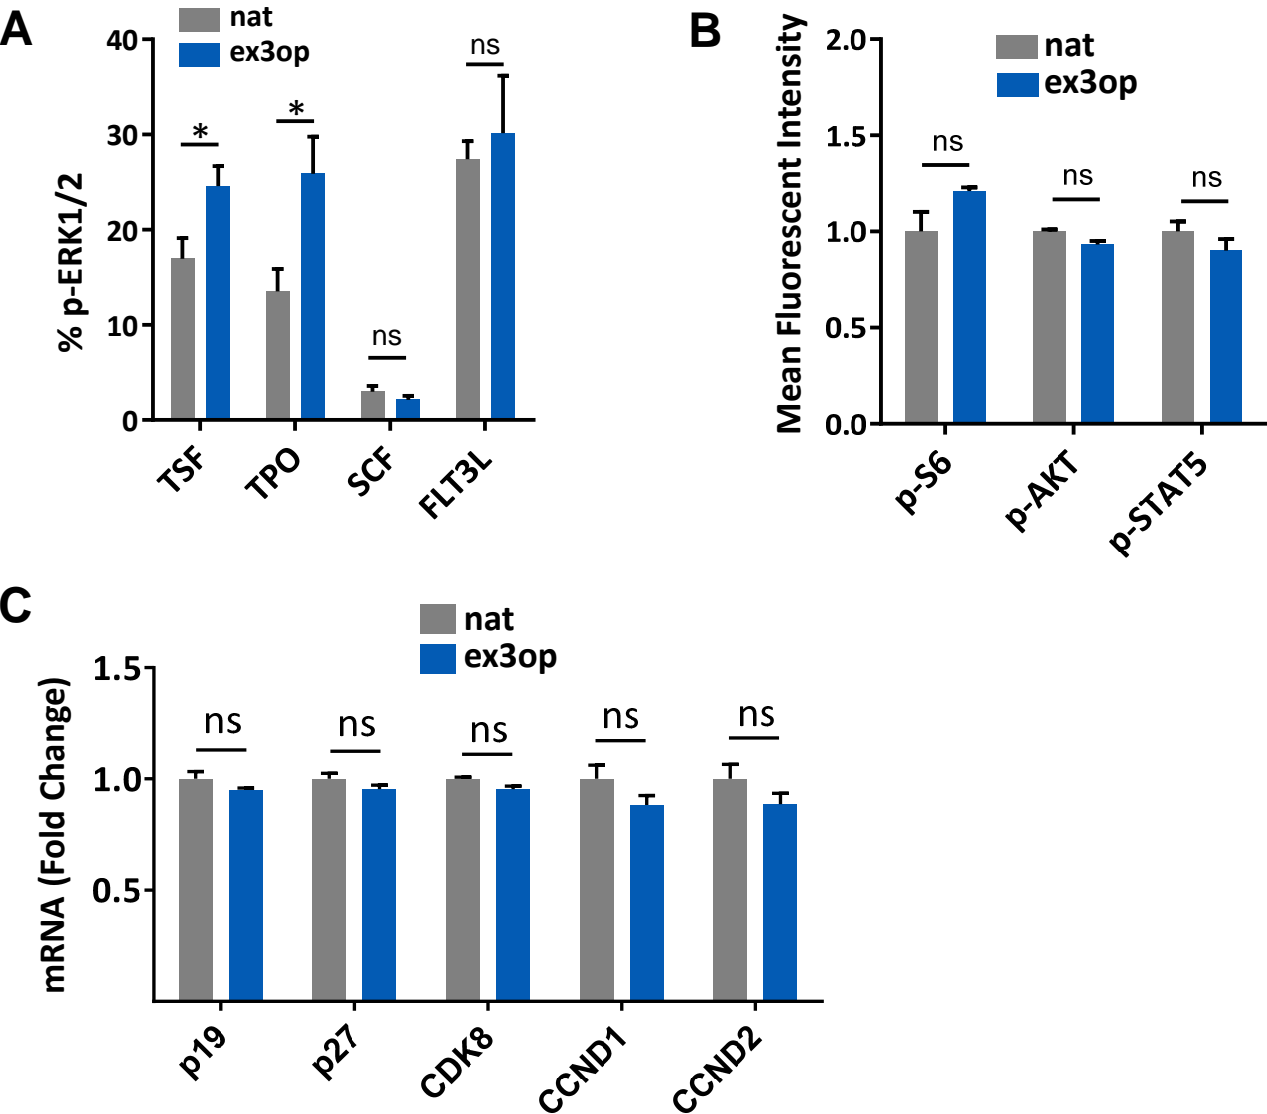

Supplement: jciinsight-3-98197-s101.pdf [file jciinsight-3-98197-s101.pdf]
